# Supplementary material for: Differential Talin cleavage in transformed and non-transformed cells and its consequences
Source: Frontiers journal article supplement (doi:10.3389/fcell.2024.1430728), 2024-07-17
Supplement: Image_1.pdf [file Image_1.pdf]

# **Supplementary**

## **Supplementary Video 1**

Representative Image of Dual FRAP Experiment of MDA231 Cells transfected by GFP-Talin-mCherry (100ms/frame). The MDA231 cells exhibit hyperactive lamellipodia and a highly diverse focal adhesion (FA) FRAP phenotype, which cannot be adequately summarized by simple averaging. Therefore, the data from these cells were not included in this study.

## **Supplementary Video 2**

Representative Image of Dual FRAP Experiment of A375P Cells transfected by GFP-Talin N Terminal Mutation- mCherry (100ms/frame)

## **Supplementary Video 3**

Representative Image of Dual FRAP Experiment of HFF Cells transfected by GFP-Talin-mCherry (100ms/frame)

## **Presentation 1**

Overview of dual FRAP experiment on FA and data analysis

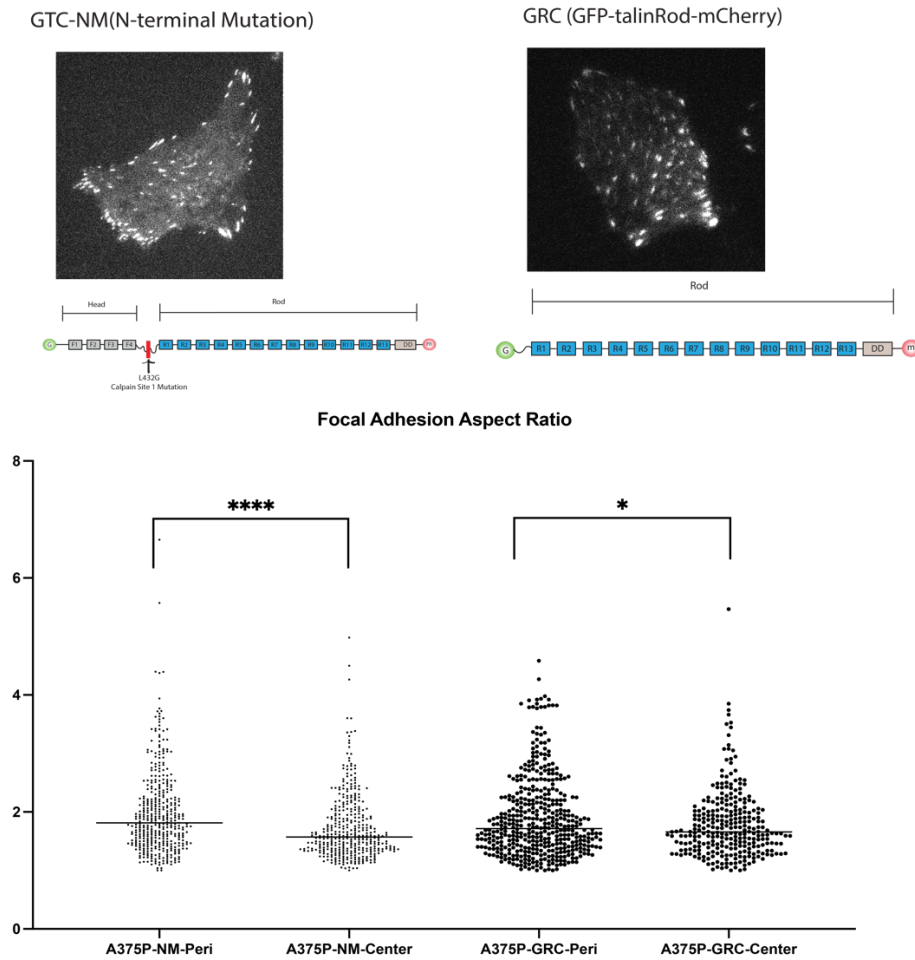

**Figure S1.** Differences in Focal Adhesion Morphology Between the Cell Periphery and Center. A375P cells transfected with GTC-NM (N-terminal mutation, L432G) and GRC (Talin rod) were analyzed. Focal adhesions located at the cell edge have a larger aspect ratio (AR) compared to those in the center. The difference in AR between peripheral and central focal adhesions is larger in GTC-NM (N-terminal mutation, L432G) compared to GRC (Talin rod). A larger aspect ratio indicates more elongated focal adhesions, which typically suggests they are under greater force.

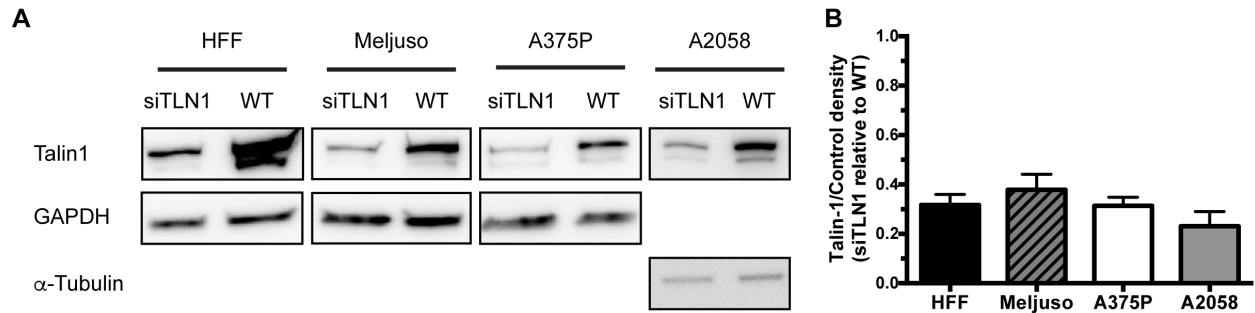

**Figure S2.** Genetic silencing of TLN1 in fibroblasts and melanoma cell lines. (A) Representative western blot images showing protein expression levels of Talin-1, GAPDH and  $\alpha$ -Tubulin in total protein lysates taken from HFF, A375P, Meljuso and A2058 cells without (WT) and with TLN1 siRNA treatment (siTLN1). (B) Bar chart showing the ratio of Talin-1 expressed in cells treated with TLN1 siRNA to the expression in wild type cells normalized by loading control (GAPDH or  $\alpha$ -Tubulin) plotted with mean and standard deviation from at least 2 blots.
